# Supplementary material for: Nucleosome eviction and multiple co-factor binding predict estrogen-receptor-alpha-associated long-range interactions
Source: PubMed Central journal article supplement — Nucleic Acids Res. 2014 Apr 29;42(11):6935–44. doi: 10.1093/nar/gku327 (PMC4066761; doi:10.1093/nar/gku327), 2014-04-29
Supplement: supp_gku327_nar-00021-m-2014-File008.pdf [file supp_gku327_nar-00021-m-2014-File008.pdf]

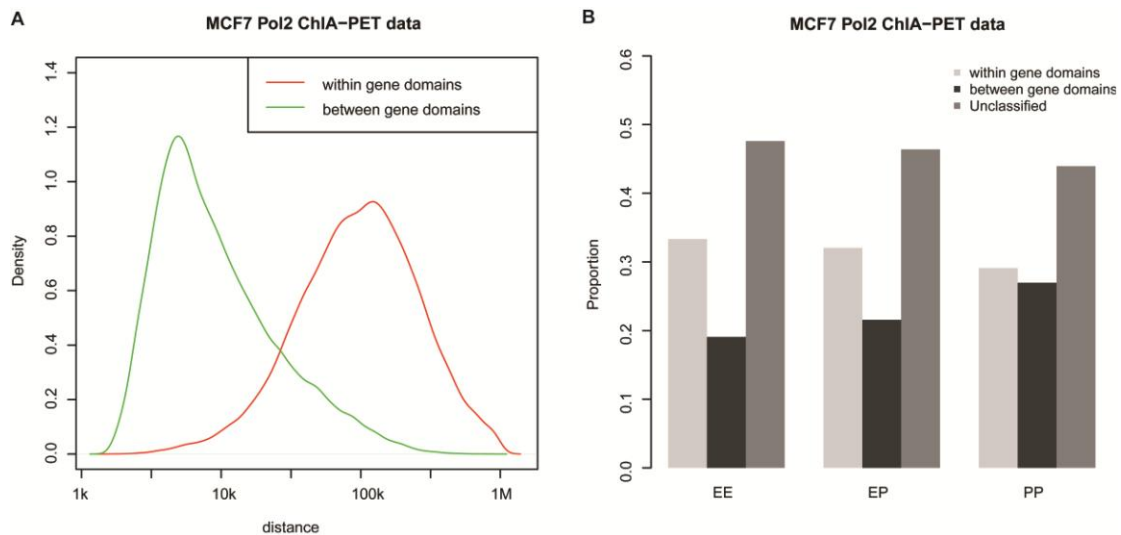

**Figure S1.** (A) Log<sub>10</sub>-distance distribution between the two ends of interaction cluster within gene domains (Group A) and between gene domains (Group B). (B) Proportion of EE, EP and PP interactions that belong to Group A or Group B interactions. We defined regulatory domain of a gene as the two flanking regions (-10kb upstream of TSS and 10kb downstream of 3'UTR) plus gene body. Interactions within gene regulatory domains (denoted as Group A interactions) were those that both ends were located within the regulatory domain of the same gene and not overlapping with regulatory domain of any other genes. Interactions between gene domains (denoted as Group B interactions) were those that crossed at least two promoters of different genes.

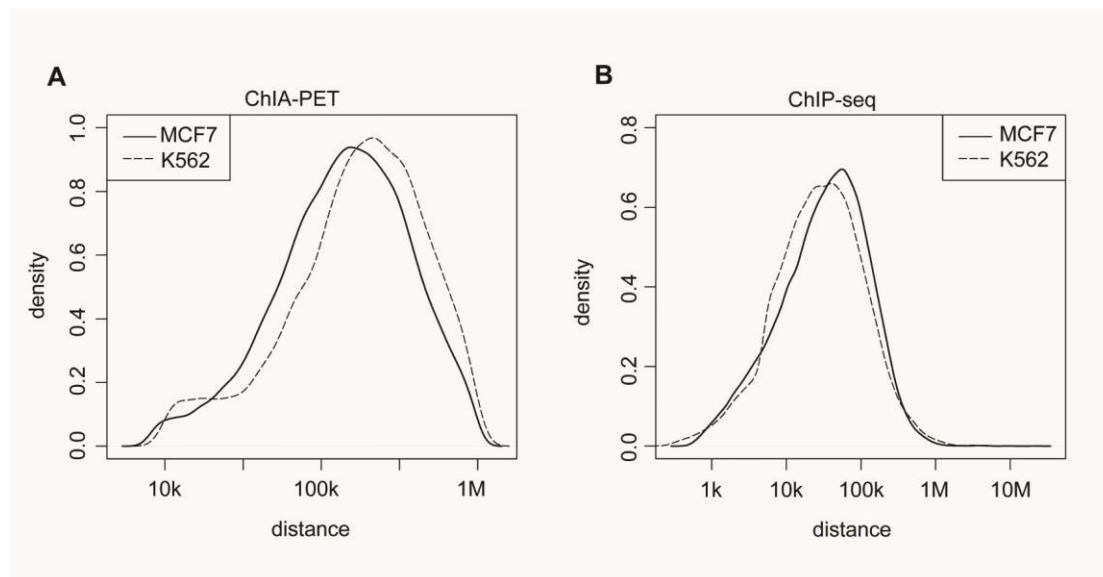

**Figure S2.** (A) Log<sub>10</sub>-distance distribution of the two ends of PETs 2+ clusters of MCF7 and K562 CTCF ChIA-PET data. Interactions overlapping with H3K4me1 or H3K4me3 peaks were removed. The peak position was 5.2 for MCF7 and 5.3 for K562. (B) Log<sub>10</sub>-distance distribution of neighboring CTCF binding sites that did not overlap with either H3K4me1 or H3K4me3 peaks in MCF7 and K562 cell lines. The peak position was 4.7 for MCF7 and 4.6 for K562.

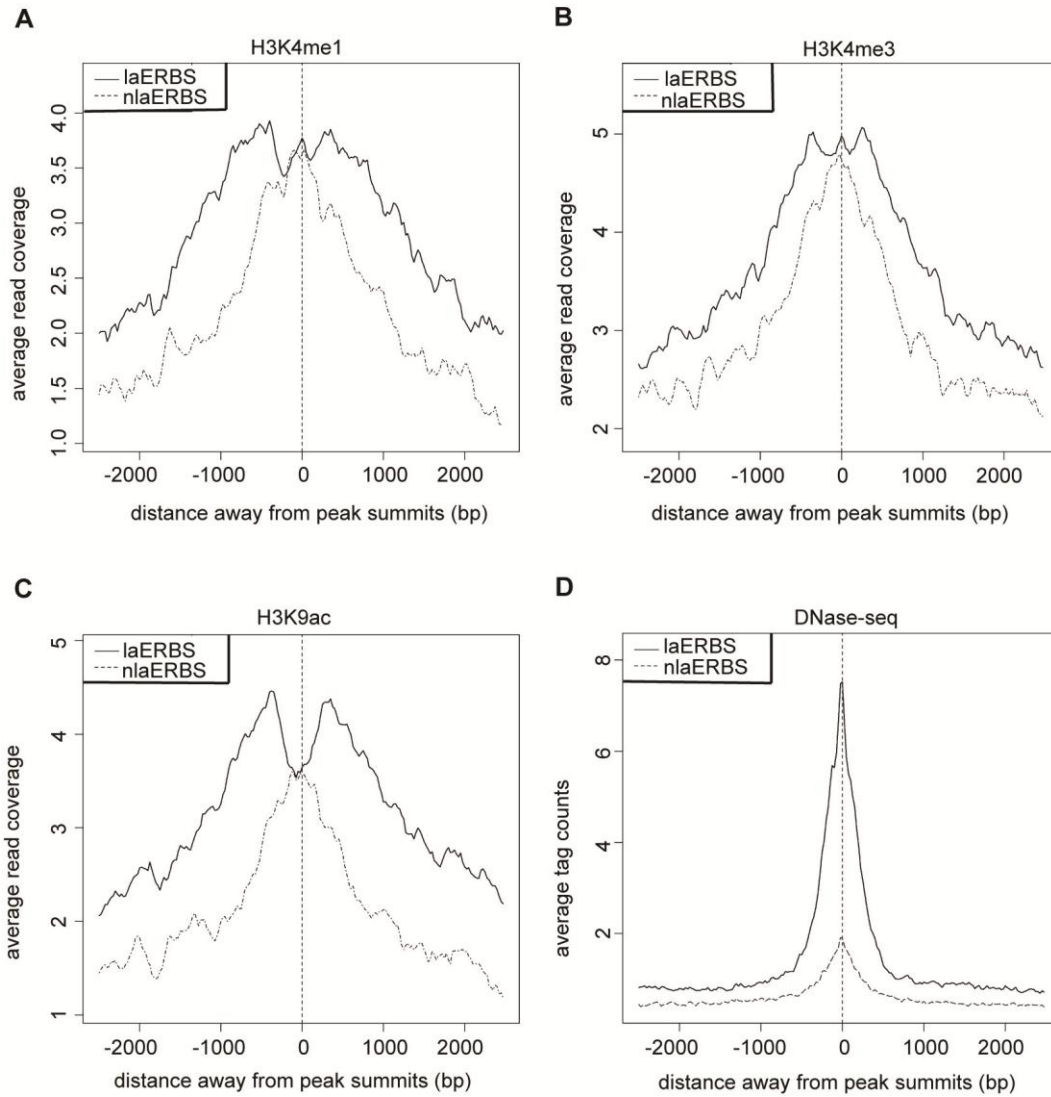

**Figure S3.** Average H3K4me1 (A), H3K4me3 (B) and H3K9ac (C) read coverage against input surrounding laERBSs and nlaERBSs. Average DNase-seq tag counts surrounding laERBSs and nlaERBSs (D).

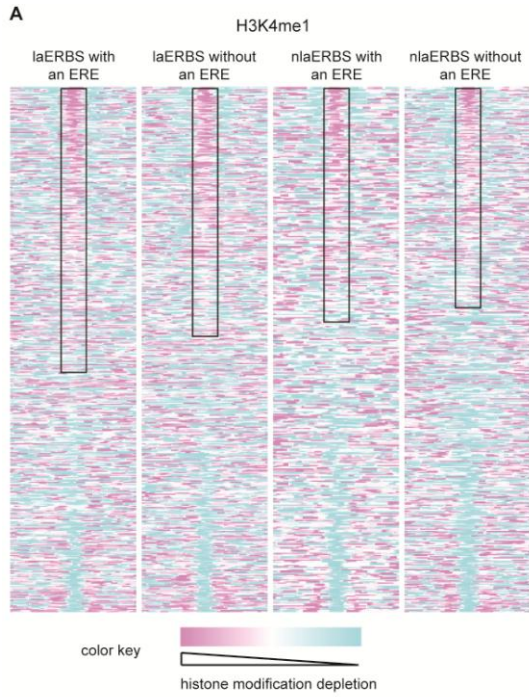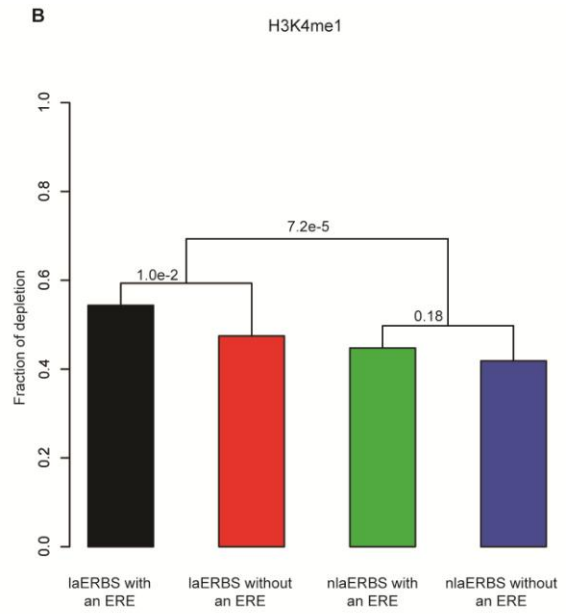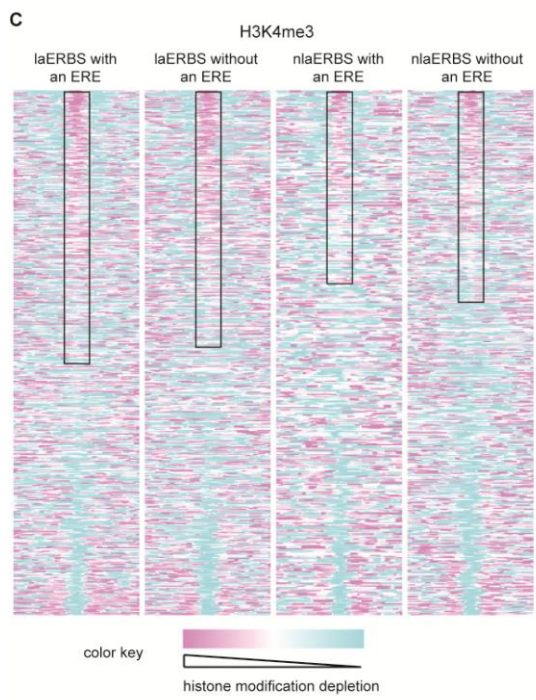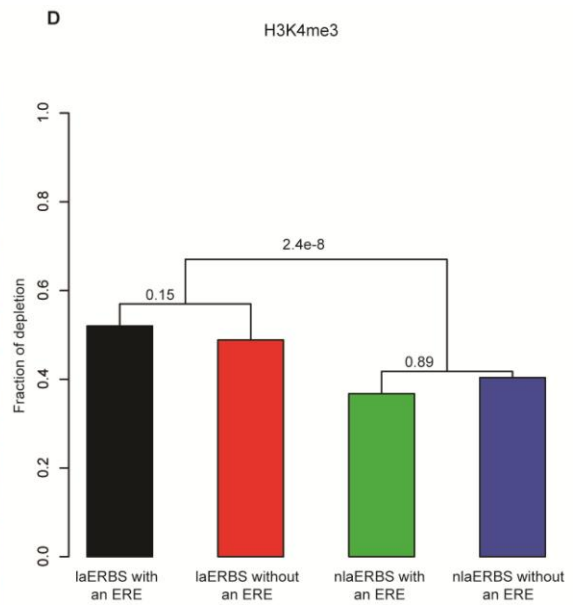

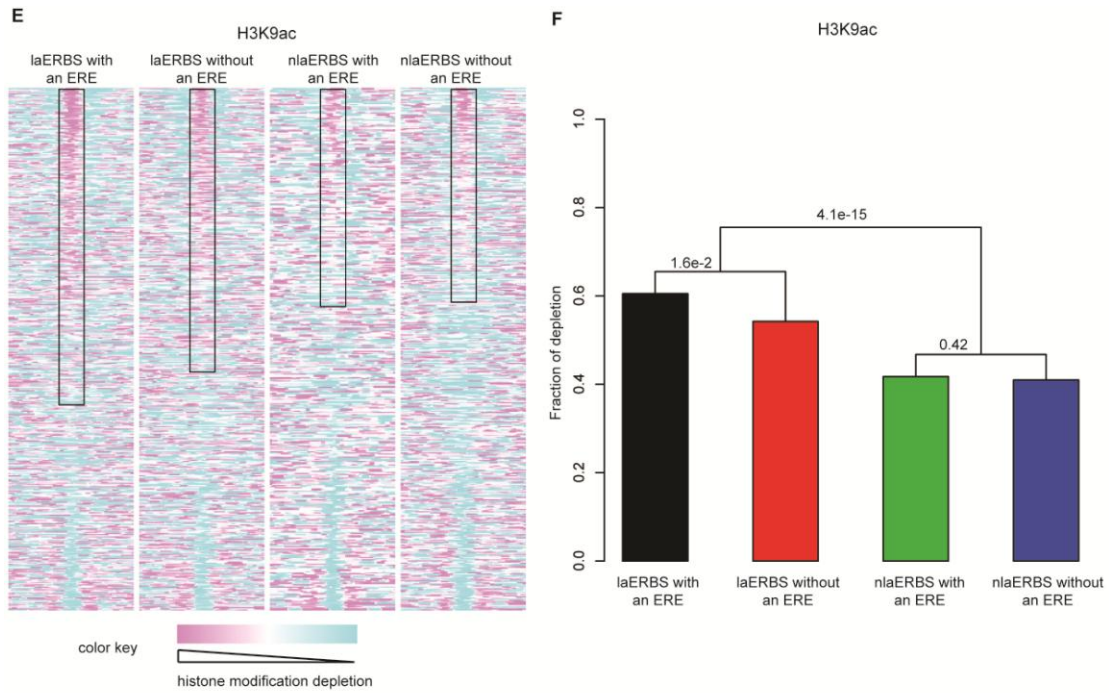

**Figure S4.** Heatmap show of H3K4me1 (A), H3K4me3 (C) and H3K9ac (E) log<sub>2</sub> transformed ratio of read coverage against input around summits of four types of ERBSs: laERBS with an ERE, laERBS without an ERE, nlaERBS with an ERE and nlaERBS without an ERE. Each row represented signal strengths of  $\pm 2.5$ kb region around the summit of ERBS. To make the signal values comparable between different ERBSs, signal values in each row were scaled between 0 and 1. To quantify central histone modification depletion level, we defined  $H_{i,j}$  as the differences between log<sub>2</sub> transformed ratio of read-coverage against input in central region ( $\pm 100$ bp region relative to the peak summit) to average of read-coverage against input in the two flanking regions ( $-400$ bp to  $-200$ bp and  $+200$ bp to  $+400$ bp relative to peak summit) of ERBS  $i$  for histone modification  $j$ . Then each row (A), (C) and (E) was ranked by  $H_{i,j}$ . Black rectangle marked those ERBSs with  $H_{i,j} < 0$ . Barplot show of fraction of H3K4me1 (B), H3K4me3 (D) and H3K9ac (F) depletion (defined as  $H_{i,j} < 0$ ) in the center of four types of ERBSs: laERBS with an ERE, laERBS without an ERE, nlaERBS with an ERE and nlaERBS without an ERE. P-values were given by one-tailed Fisher test.

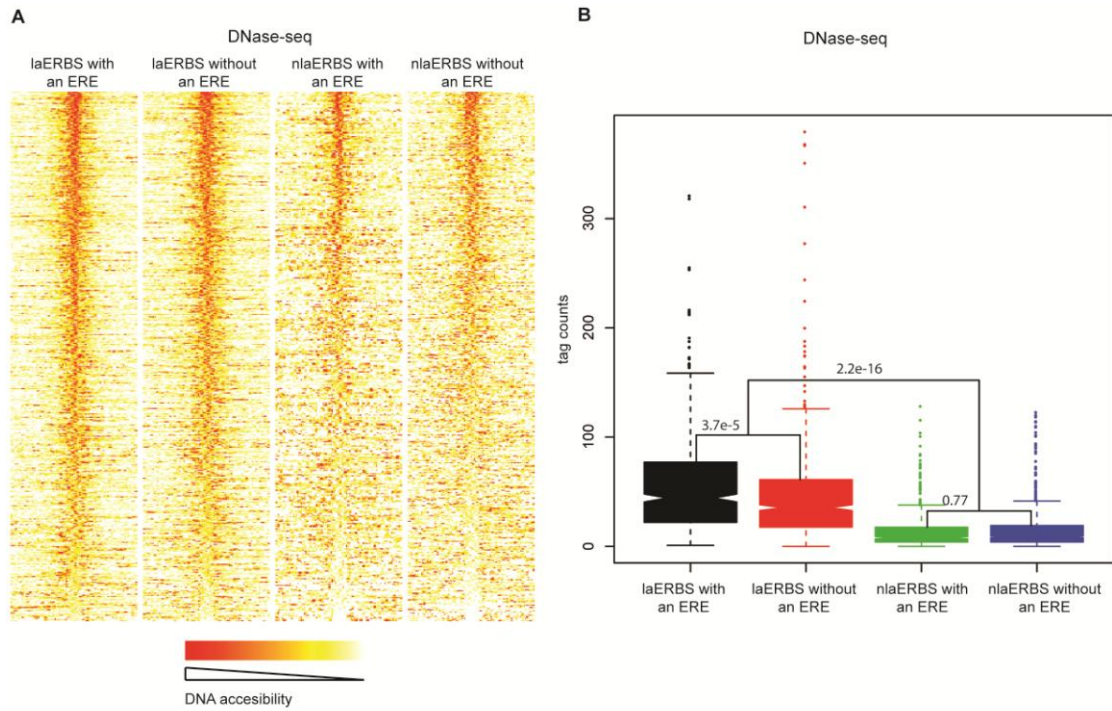

**Figure S5.** (A) Heatmap show of DNase-seq tag counts around the summit of four types of ERBSs: laERBSs with and without an ERE and nlaERBSs with and without an ERE. Each row was simply ranked by scaled tag counts in the central 200bp region of ERBS. (B) Boxplot of tag counts in the central 200bp region of four types of ERBSs. P-values were given by one-tailed Wilcox test.



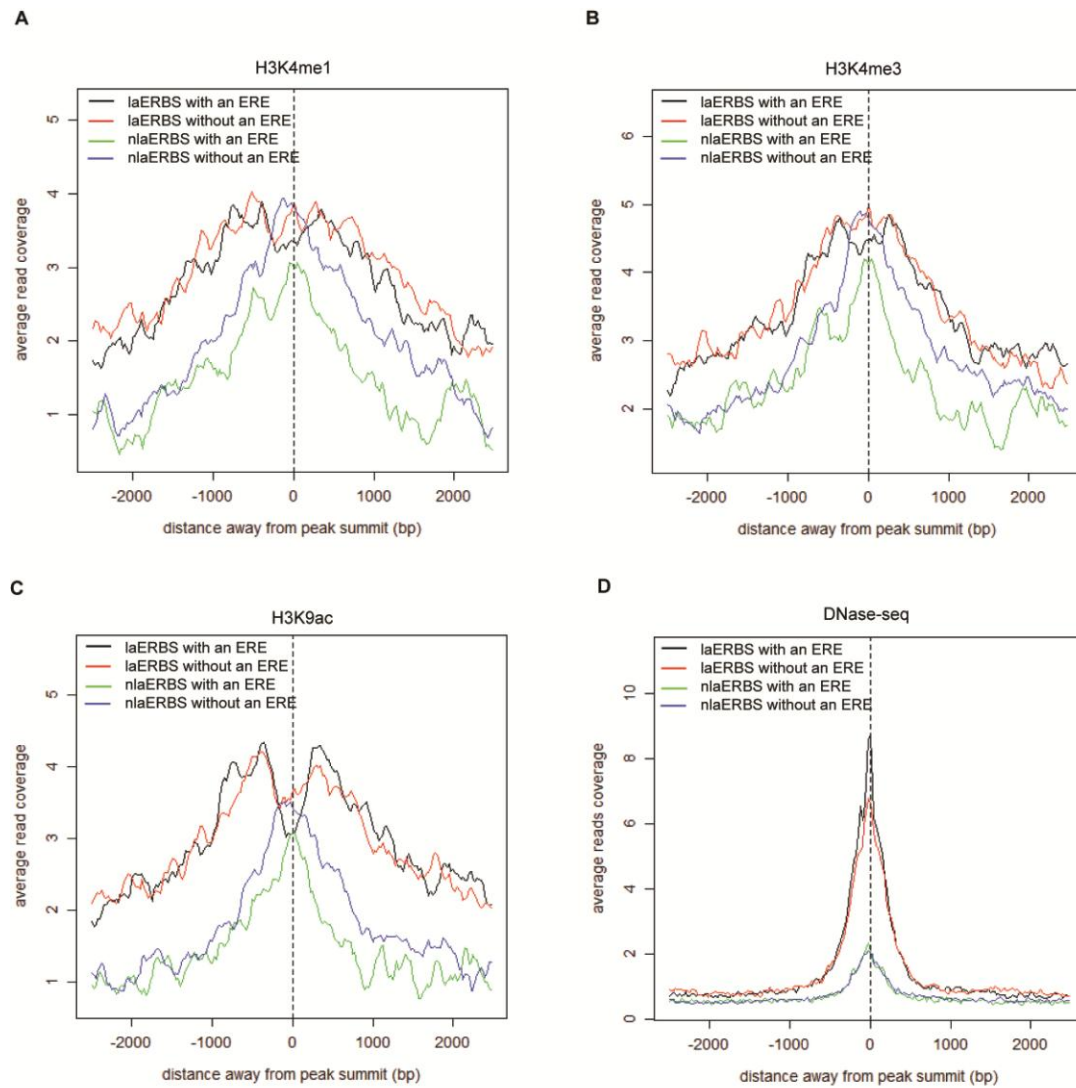

**Figure S6.** This figure is a complement for Figure 2 in the main text. Compared with Figure 2, ERBSs located within 2kb away from annotated gene TSS were not included. Average H3K4me1 (A), H3K4me3 (B) and H3K9ac (C) read-coverage against input surrounding laERBSs with and without an ERE and nlaERBSs with and without an ERE. Average DNase-seq tag counts surrounding laERBSs with and without an ERE and nlaERBSs with and without an ERE (D).

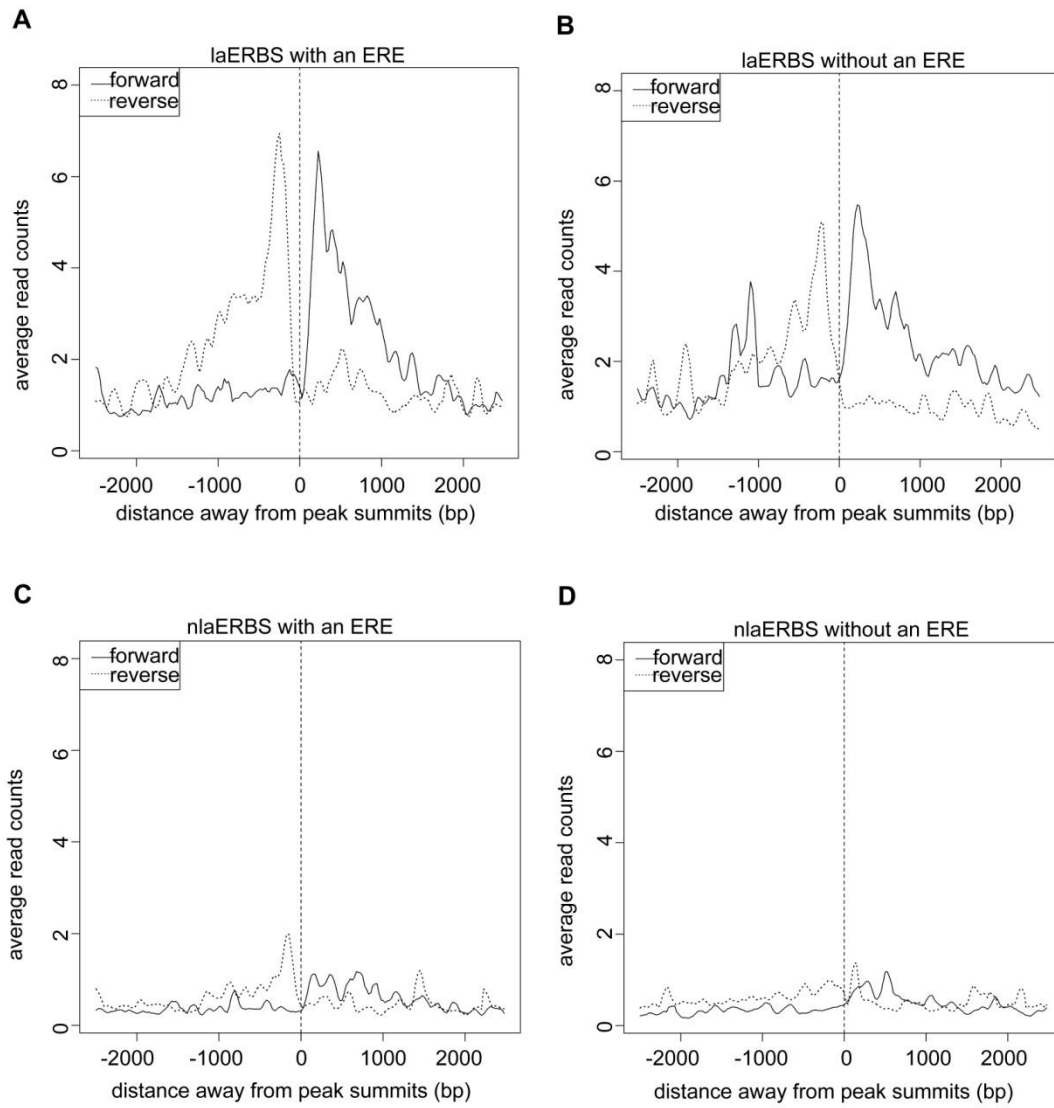

**Figure S7.** Average GRO-seq signal surrounding laERBSs with and without an ERE and nlaERBSs with and without an ERE.

|         | laERBS with an ERE (552) | laERBS without an ERE (651) | nlaERBS with an ERE (400) | nlaERBS without an ERE (803) |
|---------|--------------------------|-----------------------------|---------------------------|------------------------------|
| H3K4me1 | 300                      | 309                         | 179                       | 336                          |
| H3K4me3 | 287                      | 318                         | 147                       | 324                          |
| H3K9ac  | 334                      | 353                         | 167                       | 329                          |

**Table S1.** Numbers of ERBSs with  $H_{i,j} < 0$  in four types of ERBSs.  $H_{i,j}$  was defined the same as in Figure S4

|              | laERBS with an ERE (552) | laERBS without an ERE (651) | nlaERBS with an ERE (400) | nlaERBS without an ERE (803) |
|--------------|--------------------------|-----------------------------|---------------------------|------------------------------|
| FoxA1        | 512                      | 595                         | 193                       | 400                          |
| GATA3        | 512                      | 599                         | 175                       | 341                          |
| AP2 $\gamma$ | 464                      | 560                         | 147                       | 451                          |
| p300         | 276                      | 265                         | 27                        | 60                           |

**Table S2.** Numbers of ChIP-seq binding peaks that overlapped with four types of ERBSs.

| Variable         | coefficient | p-value  |
|------------------|-------------|----------|
| ER $\alpha$      | 1.52        | <2.2e-16 |
| FoxA1            | 0.39        | 0.000377 |
| GATA3            | 0.36        | 0.039454 |
| AP2 $\gamma$     | -0.17       | 0.176848 |
| DNase-seq        | 0.68        | 1.69e-05 |
| H3K4me1          | -0.34       | 0.009967 |
| H3K4me2          | -0.20       | 0.037300 |
| H3K4me3          | 0.11        | 0.547894 |
| H3K27me3         | -0.44       | 9.32e-05 |
| P300             | -0.88       | 7.38e-06 |
| Pol2             | 0.24        | 0.124450 |
| Log10-distance   | -3.72       | <2.2e-16 |
| Inverse distance | -1.02969    | 0.002403 |

**Table S3.** Trained parameters for all the training set with all the features selected to predict interactions. P-value is given by R with logistic regression.



| Variable         | coefficient | p-value  |
|------------------|-------------|----------|
| ER $\alpha$      | 1.51        | < 2e-16  |
| FoxA1            | 0.39        | 6.00e-05 |
| AP2 $\gamma$     | -0.32       | 0.00306  |
| DNase-seq        | 0.65        | 1.75e-06 |
| H3K4me2          | -0.18       | 0.01308  |
| H3K27me3         | -0.68       | 3.76e-13 |
| Log10 distance   | -3.63       | < 2e-16  |
| Inverse distance | -0.98       | 0.00317  |

**Table S4.** Trained parameters for all the training set with eight features selected to predict interactions. P-value is given by R with logistic regression.

|                 | Reported (3113) | Predicted & Unreported (8805) | Non-predicted & unreported (85284) |
|-----------------|-----------------|-------------------------------|------------------------------------|
| PETs 2+ cluster | 1239            | 2759                          | 7687                               |
| PETs 3+ cluster | 904             | 1932                          | 4749                               |

**Table S5.** Numbers of reported, predicted and unreported, and rest of the candidate (non-predicted and unreported) ERBS-ERBS pairs overlapped with Pol2 PETs 2+ and PETs 3+ clusters, respectively.

|                 | Reported (113) | Predicted & Unreported (475) | Non-predicted & unreported (87500) |
|-----------------|----------------|------------------------------|------------------------------------|
| PETs 2+ cluster | 57             | 214                          | 14790                              |
| PETs 3+ cluster | 47             | 174                          | 9847                               |

**Table S6.** Numbers of reported, predicted and unreported, and rest of the candidate (non-predicted and unreported) ERBS-promoter pairs overlapped with Pol2 PETs 2+ and PETs 3+ clusters, respectively.

|                    | Predicted (374) | Rest (9098) | p-value   |
|--------------------|-----------------|-------------|-----------|
| 12h up-regulated   | 33              | 245         | 1.265e-08 |
| 24h up-regulated   | 21              | 189         | 8.205e-05 |
| 48h up-regulated   | 29              | 418         | 0.005724  |
| 12h down-regulated | 0               | 61          | 1         |
| 24h down-regulated | 0               | 36          | 1         |
| 48h down-regulated | 3               | 126         | 0.8896    |

**Table S7.** Enrichment comparison of E2 induced differential expressed gene in predicted ER $\alpha$  target and rest of the candidate genes. Tests were performed in R by one-tailed Fisher test.
